# Supplementary material for: Frustrated Lewis pairs photocatalyst for visible light-driven reduction of CO to multi-carbon chemicals
Source: Royal Society of Chemistry journal article supplement (doi:10.1039/c9nr07559c), 2019-01-01
Supplement: c9nr07559c1.pdf [file c9nr07559c1.pdf]

## Supporting Information

### **Frustrated Lewis Pairs Photocatalyst for Visible Light-Driven Reduction of CO into Multi-carbon Chemicals**

Zhe Chen,<sup>a,b</sup> Jia Zhao,<sup>b</sup> Jingxiang Zhao,<sup>b,\*</sup> Zhongfang Chen,<sup>c,\*</sup> Lichang Yin<sup>a,\*</sup>

<sup>a</sup> Shenyang National Laboratory for Materials Science, Institute of Metal Research,  
Chinese Academy of Sciences, Shenyang, 110016, China

<sup>b</sup> College of Chemistry and Chemical Engineering, and Key Laboratory of Photonic  
and Electronic Bandgap Materials, Ministry of Education, Harbin Normal University,  
Harbin, 150025, China

<sup>c</sup> Department of Chemistry, University of Puerto Rico, Rio Piedras Campus, San Juan,  
PR, 00931, USA

\* To whom correspondence should be addressed. Email: xjz\_hmily@163.com (JZ);  
zhongfangchen@gmail.com (ZC); lcyin@imr.ac.cn (LY)

## Complement to Computational Detail

The adsorption energy ( $E_{ads}$ ) of the single B atom on C<sub>2</sub>N and CO species on B/C<sub>2</sub>N substrate was calculated based on the equation:  $E_{ads} = E_{total} - E_{substrate} - E_{adsorbate}$ , where  $E_{total}$ ,  $E_{substrate}$  and  $E_{adsorbate}$  represent the total energies of the systems containing the substrate and adsorbate, the substrate, and the adsorbate, respectively. According to this definition, a more negative adsorption energy indicates a stronger adsorption.

The Gibbs reaction free energy change ( $\Delta G$ ) of each elementary step during the CO reduction process was calculated by using the computational hydrogen electrode (CHE) model proposed by Nørskov *et al.*<sup>1</sup> The chemical potential of the proton-electron pair in aqueous solution is related to that of one-half of the chemical potential of an isolated hydrogen molecule. Based on this model, the  $\Delta G$  value can be obtained by the formula:  $\Delta G = \Delta E + \Delta ZPE - T\Delta S + \Delta G_{pH} + eU$ , where  $\Delta E$  is the reaction energy of reactant and product species adsorbed on the catalyst directly obtained from DFT computations;  $\Delta ZPE$  and  $\Delta S$  are the changes between the adsorbed species and the gas phase molecules in zero point energies and entropy at 298.15 K, which can be calculated from the vibrational frequencies.  $\Delta G_{pH}$  is the free energy correction of  $pH$ , and can be calculated by:  $\Delta G_{pH} = K_B T \times pH \times \ln 10$ . Notably, the  $pH$  value was set to be zero in this work for simplicity;  $U$  was the applied potential.

The reaction potentials of CO with respect to the normal hydrogen electrode (NHE, pH=0) can be calculated by :

$$\varphi = \frac{-1}{nF} \times [ \Delta_f G_{(product)}^o - \Delta_f G_{(reactant)}^o ]$$

where  $n$  is the number of electrons,  $F$  is the Faraday constant, and  $\Delta_f G_{(x)}^o$  stands for the Gibbs free energy of  $x$  at the standard state under the pressure of one bar and the temperature of 298.15 K, which can be obtained in the CRC handbook.<sup>2</sup>

**Table S1.** The adsorption energies of an isolated B atom at different decoration sites on monolayer C<sub>2</sub>N. The definition of each site can be referred from Figure 1 in the main text.

| Site | E <sub>ads</sub> (eV) |
|------|-----------------------|
| 1    | -2.31                 |
| 2    | -5.46                 |
| 3    | Relax to site 2       |
| 4    | -1.33                 |
| 5    | -1.01                 |

**Table S2.** The calculated charge transfer (unit in electrons) of the decorated B atom, the host N atoms (N<sub>CO</sub>) directly binding with the adsorbed CO, and the adsorbed CO molecules on B/C<sub>2</sub>N (the charges on all the atoms of the B/C<sub>2</sub>N substrate except for that of N<sub>CO</sub> are summed into the B atom). The positive and negative data represent the charge loss and gain, respectively.

| Numbers of CO           | 1     | 2     | 3     | 4     | 5     |
|-------------------------|-------|-------|-------|-------|-------|
| <b>B atom</b>           | -0.18 | -0.14 | -0.15 | -0.20 | -0.20 |
| <b>N atom</b>           | +0.00 | +0.11 | +0.11 | +0.12 | +0.12 |
| <b>CO<sub>(n)</sub></b> | +0.18 | +0.03 | +0.04 | +0.08 | +0.08 |

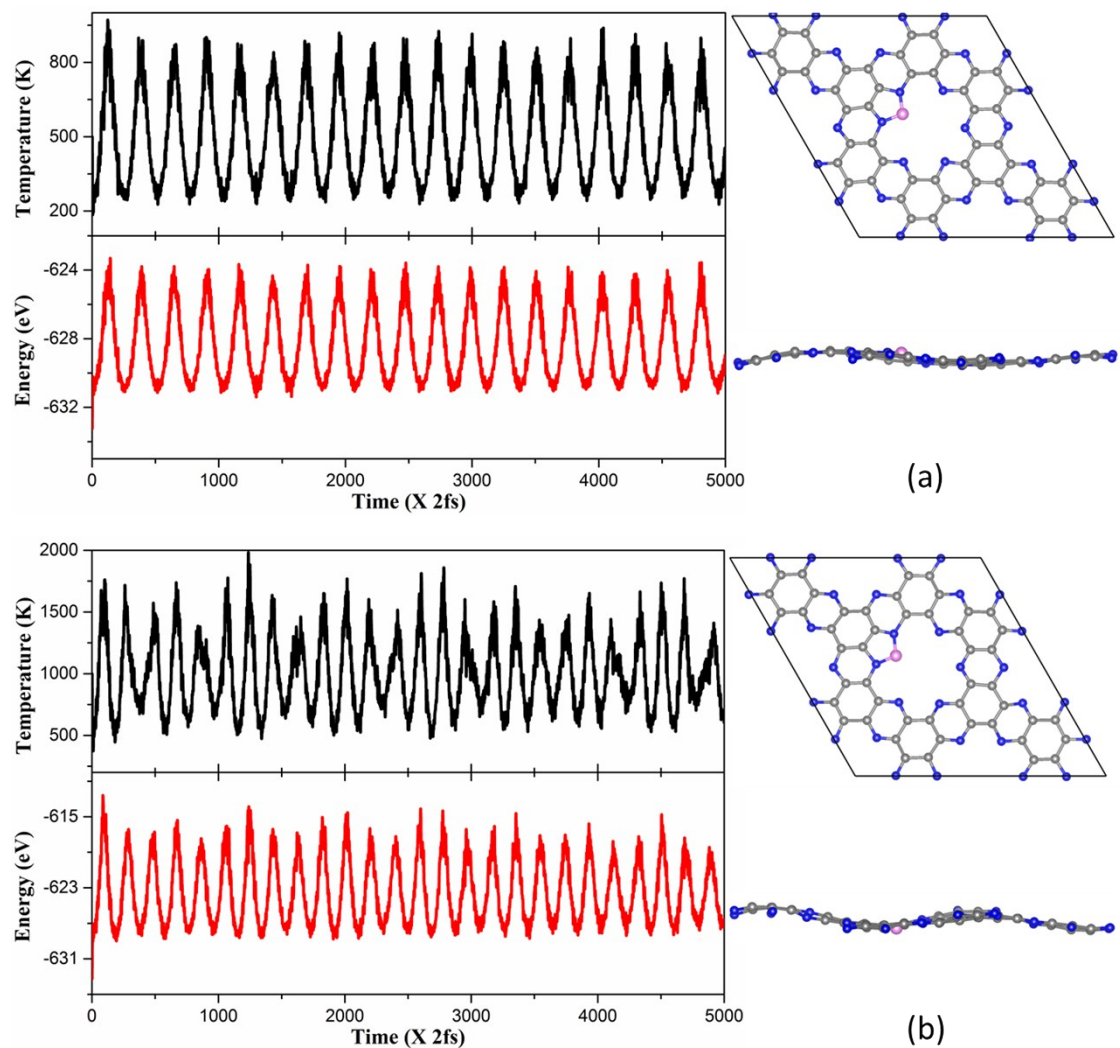

**Figure S1.** Variations of temperature and energy versus the time for AIMD simulations of B/C<sub>2</sub>N, which is run under (a) 500 K and (b) 1000 K for 10 ps with a time step of 2 fs. Schematic diagrams of the B/C<sub>2</sub>N atomic configuration after dynamics simulation (top and side views) are also given, the C, N, and B atoms are denoted by the grey, blue, and purple balls, respectively.

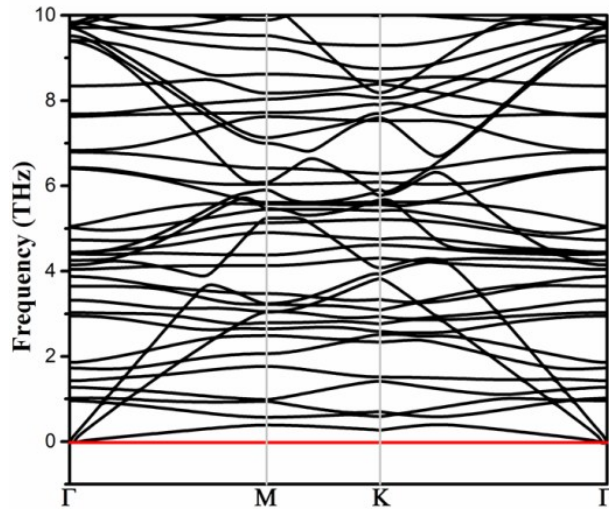

**Figure S2.** The calculated phonon dispersion of B/C<sub>2</sub>N monolayer along the high-symmetry lines in the first Brillouin zone.

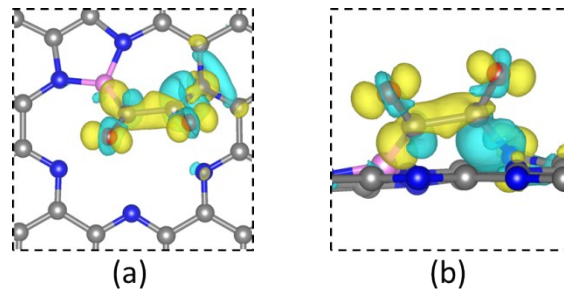

**Figure S3.** (a) Top view and (b) side view of the difference charge density plot for B/C<sub>2</sub>N with two adsorbed CO molecules. The isosurface value is  $0.008 e/\text{\AA}^3$ , the charge accumulated and depleted regions are shown in yellow and cyan, respectively.

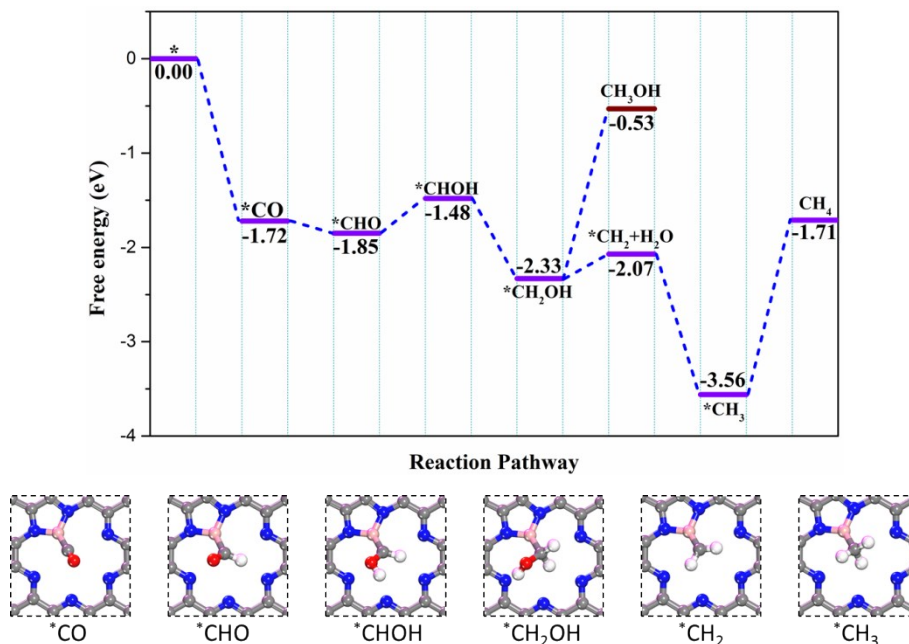

**Figure S4.** Gibbs free energy diagrams of CO reduction into CH<sub>3</sub>OH and CH<sub>4</sub> at 0 V potentials. The structures of corresponding reaction intermediates are given in the lower panel.

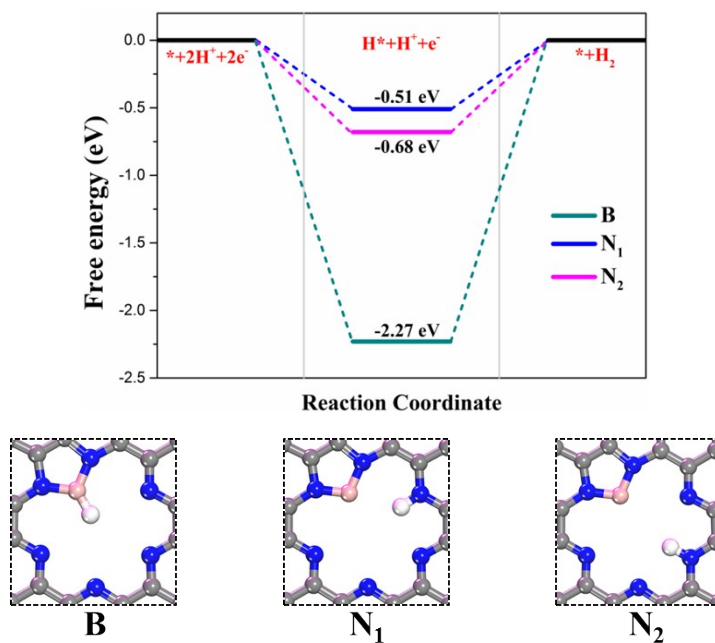

**Figure S5.** Gibbs free energy diagrams of HER on B/C<sub>2</sub>N with different active sites (labeled B, N<sub>1</sub> and N<sub>2</sub>). The corresponding reaction intermediates are given in the lower panel.

## References

- (1) J. K. Nørskov, J. Rossmeisl, A. Logadottir, L. Lindqvist, J. R. Kitchin, T. Bligaard and H. Jonsson, *J. Phys. Chem. B*, 2004, **108**, 17886-17892.
- (2) W. M. Haynes, *CRC handbook of chemistry and physics*; *CRC press*, 2014.
